# Supplementary material
Source: publisher figshare collection journal article supplement (https://acs.figshare.com/ndownloader/files/5747232)
Supplement: Supplementary file 1 [file 5747232]

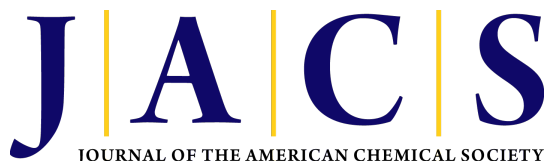

JOURNAL OF THE AMERICAN CHEMICAL SOCIETY

J. Am. Chem. Soc., 1996, 118(11), 2750-2751, DOI: [10.1021/ja953061j](https://doi.org/10.1021/ja953061j)

#### Terms & Conditions

Electronic Supporting Information files are available without a subscription to ACS Web Editions. The American Chemical Society holds a copyright ownership interest in any copyrightable Supporting Information. Files available from the ACS website may be downloaded for personal use only. Users are not otherwise permitted to reproduce, republish, redistribute, or sell any Supporting Information from the ACS website, either in whole or in part, in either machine-readable form or any other form without permission from the American Chemical Society. For permission to reproduce, republish and redistribute this material, requesters must process their own requests via the RightsLink permission system. Information about how to use the RightsLink permission system can be found at <http://pubs.acs.org/page/copyright/permissions.html>

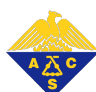

ACS Publications

MOST TRUSTED. MOST CITED. MOST READ.

Copyright © 1996 American Chemical Society

**Aromatic  $^1\text{H}$  NMR (400 MHz,  $\text{D}_2\text{O}$ ) region of compound 3 at 25, 50 and 80  $^\circ\text{C}$ .**

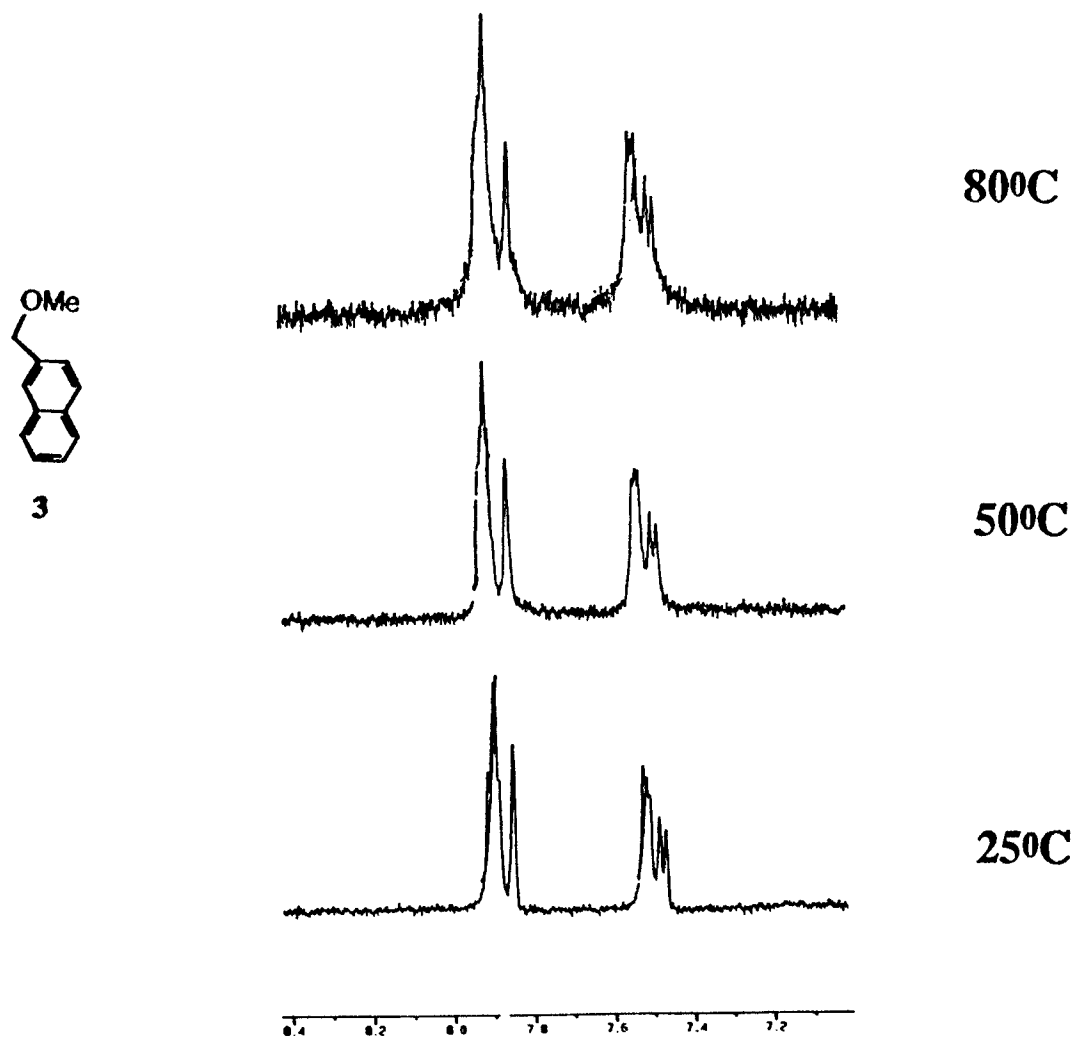

**Aromatic  $^1\text{H}$  NMR (400 MHz,  $\text{D}_2\text{O}$ ) region of  
inclusion compound  $\beta\text{-CD} / 3$  at 25, 50 and 80  $^\circ\text{C}$ .**

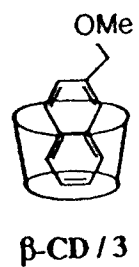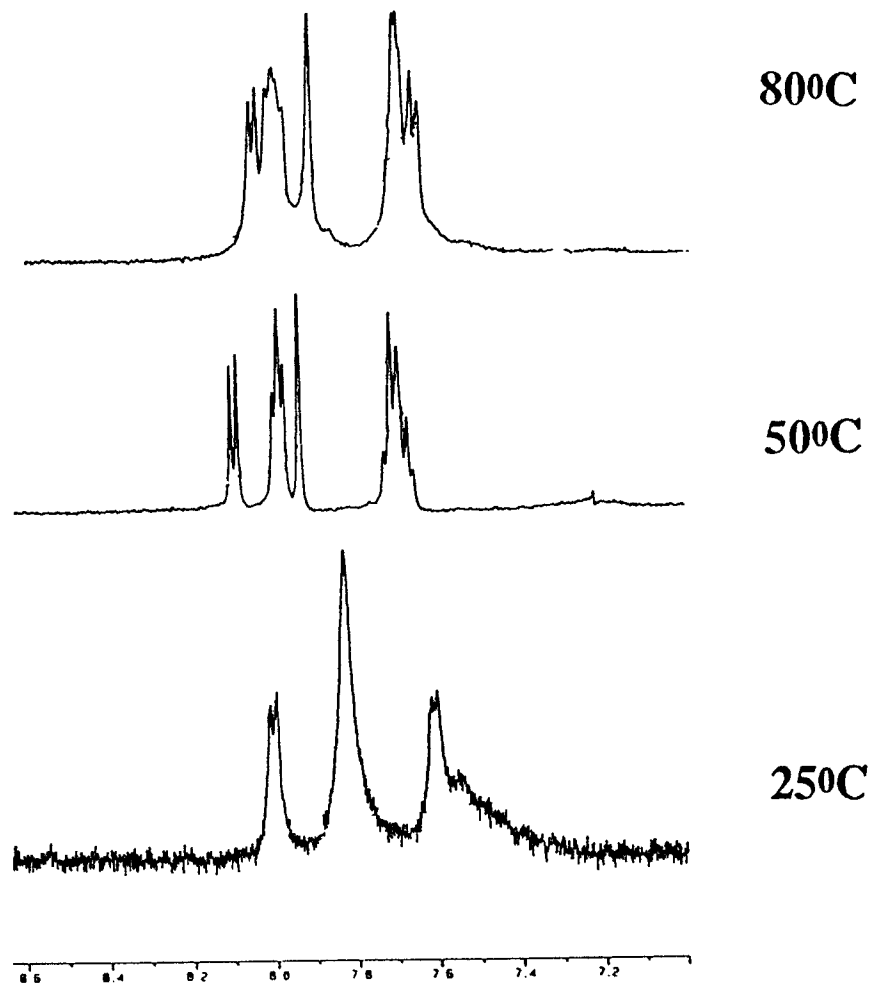

J-2751-2

# UV-absorption spectra of 2, 3 and $\beta$ -CD / 3 in H<sub>2</sub>O.

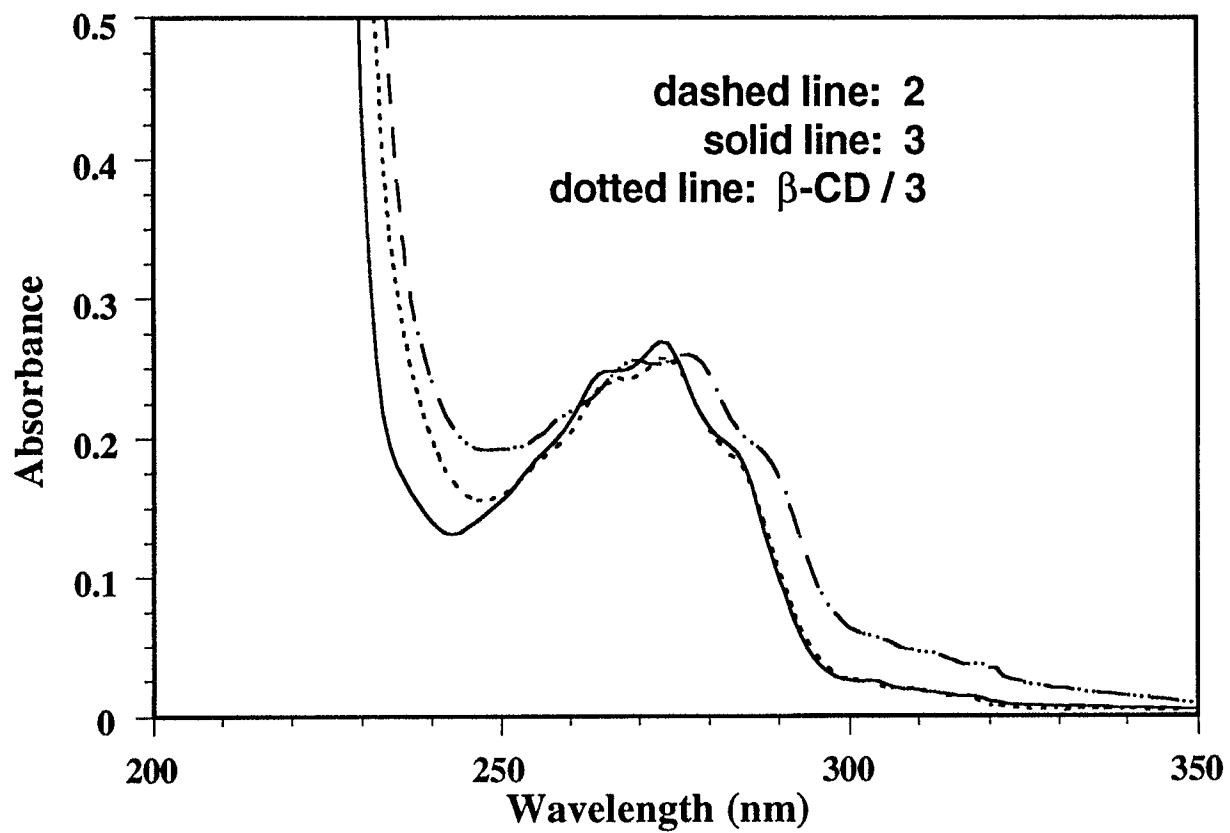

**Fluorescence spectra of 2 and  $\beta$ -CD/3 in H<sub>2</sub>O**  
(excitation at 275 nm, optically matched solutions with Abs = 0.1)

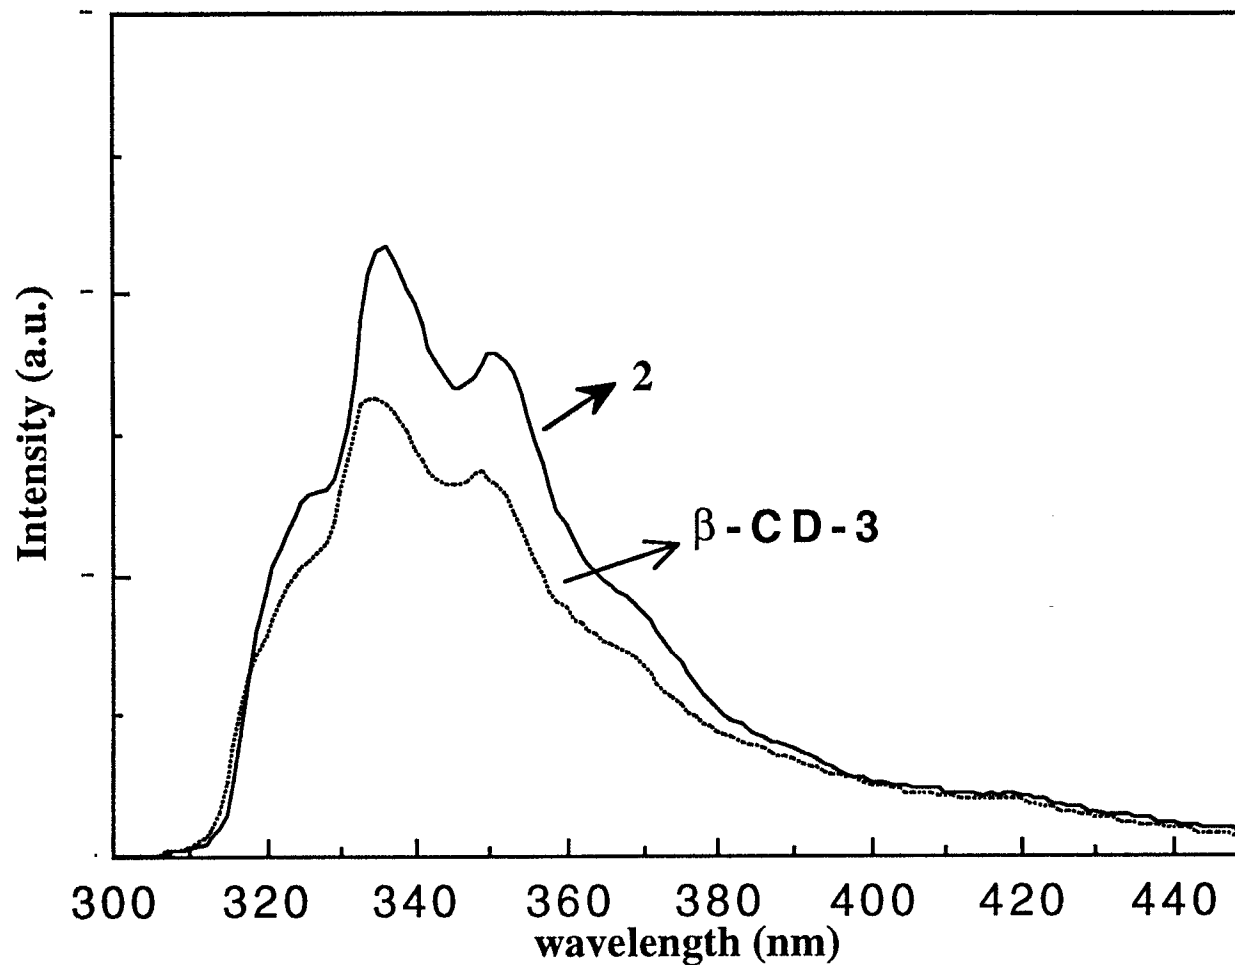

J-2751-4

## Fluorescence Properties of compound 2, 3 and $\beta$ -CD /3 in H<sub>2</sub>O

| Compound       | Conditions | $\tau$ (nsec) <sup>a</sup> | $k_q\tau$ <sup>b</sup> | $k_q$ (10 <sup>9</sup> ) <sup>c</sup> |  |
|----------------|------------|----------------------------|------------------------|---------------------------------------|--|
| 2              | Air sat'd  | 20.6                       | 39.9                   | 2.67                                  |  |
| 2              | Ar sat'd   | 21.0                       |                        |                                       |  |
| 3/ $\beta$ -CD | Air sat'd  | 26.0                       | 62.1                   | 2.26                                  |  |
| 3/ $\beta$ -CD | Ar sat'd   | 27.4                       |                        |                                       |  |
| 3              | Air sat'd  | 24.3                       | 73.6                   | 1.90                                  |  |
| 3              | Ar sat'd   | 27.5                       |                        |                                       |  |

<sup>a</sup>fluorescence lifetimes; <sup>b</sup>From slope of Stern Volmer quenching plots (M<sup>-1</sup>s<sup>-1</sup>)

<sup>c</sup>calculated bimolecular quenching rate constants. All measurements were carried out with optically dilute samples
